# Supplementary material for: Risk factors for early wheezing in preterm infants: a retrospective cohort study
Source: Research Square preprint supplement (doi:10.21203/rs.3.rs-42409/v2), 2020-10-23
Supplement: Supplementary file 1 [file f1d409ef27fc19a3c78e22bf.docx]

Appendix 6. Multivariate logistic regression analysis for risk associated with early wheezing in preterm infants (32 weeks < GA < 37 weeks).

| **Variable** | ***β*** | **SE** | **Wald** | ***P*** | **OR** | **95% CI** |
| --- | --- | --- | --- | --- | --- | --- |
| Male | 0.985 | 0.265 | 13.859 | 0.000* | 2.679 | 1.595～4.501 |
| Personal history of allergy | 0.384 | 0.243 | 2.500 | 0.114 | 1.469 | 0.912～2.365 |
| Family history of allergy | 0.699 | 0.261 | 7.198 | 0.007* | 2.012 | 1.207～3.352 |

‘*’ indicate significant results with *P* value < 0.05.
